# Supplementary material for: Enhancing musical pleasure through shared musical experience
Source: PubMed Central journal article supplement — iScience. 2024 May 11;27(6):109964. doi: 10.1016/j.isci.2024.109964 (PMC11145343; doi:10.1016/j.isci.2024.109964), 2024-05-11
Supplement: mmc1.pdf [file mmc1.pdf]

iScience, Volume 27

## **Supplemental information**

### **Enhancing musical pleasure through shared musical experience**

**Federico Curzel, François Osiurak, Eléonore Trân, Barbara Tillmann, Pablo Ripollés, and Laura Ferreri**

**SUPPLEMENTAL INFORMATION**

**Figure S1. Normal Q-Q plots of the selected linear mixed models' residuals predicting Pleasure ratings.**

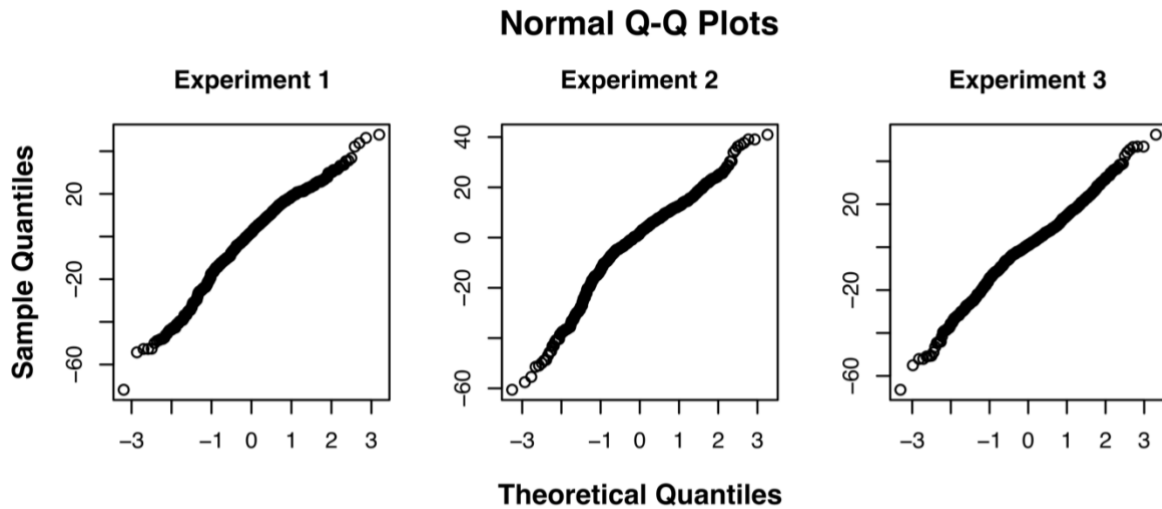

**Table S1. Tested models for Pleasure ratings in Experiment 1. All models included the Participant variable as random intercept.** In the formulas, ‘\*’ = interaction. ‘df’ = degrees of freedom. BIC = Bayesian Information Criterion.  $\Delta_i(\text{BIC})$  = difference between BIC for model i and best model’s BIC. LLi = natural logarithm of the maximum likelihood for model i. Likelihood ratio tests compare the goodness of fit of that particular model to the previous nested one (i.e., the model with the same structure minus the new predictor or interaction). Gender was not tested in interaction as not hypothesized in direct relationship with main predictors. The best model is highlighted in bold.

| Fixed effects                                    | df       | Measures of fit |                    |              | Likelihood Ratio Test |          |              |
|--------------------------------------------------|----------|-----------------|--------------------|--------------|-----------------------|----------|--------------|
|                                                  |          | BIC             | $\Delta\text{BIC}$ | LLi          | $\chi^2$              | df       | p            |
| Social Condition                                 | 5        | 6683.0          | 310.8              | -3325        |                       |          |              |
| Social Condition + Gender                        | 6        | 6681.2          | 309.0              | -3321        | 8.37                  | 1        | 0.004        |
| Social Condition + Song Category                 | 6        | 6374.3          | 2.1                | -3167        | 315.33                | 1        | < 0.001      |
| <b>Social Condition + Song Category + Gender</b> | <b>7</b> | <b>6372.2</b>   | <b>0.0</b>         | <b>-3163</b> | <b>8.64</b>           | <b>1</b> | <b>0.003</b> |
| Social Condition * Song Category                 | 8        | 6384.7          | 12.5               | -3166        | 2.69                  | 2        | 0.260        |
| Social Condition + Song Category + BMRQ+ Gender  | 8        | 6372.4          | 0.2                | -3160        | 6.36                  | 1        | 0.012        |
| Social Condition * Song Category + Gender        | 9        | 6382.7          | 10.5               | -3162        | 8.63                  | 1        | 0.003        |
| Social Condition * Song Category + BMRQ + Gender | 10       | 6382.9          | 10.7               | -3159        | 6.36                  | 1        | 0.012        |
| Social Condition * Song Category * BMRQ + Gender | 15       | 6413.7          | 41.5               | -3158        | 2.07                  | 5        | 0.839        |

**Table S2. Tested models for Pleasure ratings in Experiment 2.** All models included the Participant variable as random intercept. In the formulas, ‘\*’ = interaction. ‘df’ = degrees of freedom. BIC = Bayesian Information Criterion.  $\Delta_i(\text{BIC})$  = difference between BIC for model i and best model’s BIC. LLi = natural logarithm of the maximum likelihood for model i. Likelihood ratio tests compare the goodness of fit of that particular model to the previous nested one (i.e., the model with the same structure minus the new predictor or interaction). Gender was not tested in interaction as not hypothesized in direct relationship with main predictors. The best model is highlighted in bold.

| Fixed effects                                    | df       | Measures of fit |                    |              | Likelihood Ratio Test |          |                   |
|--------------------------------------------------|----------|-----------------|--------------------|--------------|-----------------------|----------|-------------------|
|                                                  |          | BIC             | $\Delta\text{BIC}$ | LLi          | $\chi^2$              | df       | p                 |
| Social Condition                                 | 5        | 8056.2          | 574.1              | -4011        |                       |          |                   |
| <b>Social Condition + Song Category</b>          | <b>6</b> | <b>7482.1</b>   | <b>0.0</b>         | <b>-3721</b> | <b>580.89</b>         | <b>1</b> | <b>&lt; 0.001</b> |
| Social Condition + Gender                        | 7        | 8068.8          | 615.4              | -4011        | 0.987                 | 2        | 0.611             |
| Social Condition + Song Category + Gender        | 8        | 7494.5          | 12.4               | -3720        | 581.10                | 1        | < 0.001           |
| Social Condition * Song Category                 | 8        | 7495.4          | 13.3               | -3721        | 0.309                 | 2        | 0.857             |
| Social Condition + Song Category + BMRQ+ Gender  | 9        | 7499.4          | 17.3               | -3719        | 1.84                  | 1        | 0.175             |
| Social Condition * Song Category + Gender        | 10       | 7507.7          | 25.6               | -3720        | 1.19                  | 2        | 0.551             |
| Social Condition * Song Category + BMRQ + Gender | 11       | 7512.7          | 30.6               | -3719        | 0.309                 | 2        | 0.857             |
| Social Condition * Song Category * BMRQ + Gender | 16       | 7544.6          | 62.5               | -3718        | 2.07                  | 5        | 0.839             |

**Table S3. Tested models for Ultimatum Game's offers in Experiment 2.** All models included the Participant variable as random intercept. In the formulas, '\*' = interaction. 'df' = degrees of freedom. BIC = Bayesian Information Criterion.  $\Delta_i(\text{BIC})$  = difference between BIC for model i and best model's BIC. LLi = natural logarithm of the maximum likelihood for model i. Likelihood ratio tests compare the goodness of fit of that particular model to the previous nested one (i.e., the model with the same structure minus the new predictor or interaction). Gender was not tested in interaction as not hypothesized in direct relationship with main predictors. The best model is highlighted in bold.

| Fixed effects                               | df       | Measures of fit |                    |              | Likelihood Ratio Test |    |       |
|---------------------------------------------|----------|-----------------|--------------------|--------------|-----------------------|----|-------|
|                                             |          | BIC             | $\Delta\text{BIC}$ | LLi          | $\chi^2$              | df | p     |
| <b>Social Condition + Pleasure</b>          | <b>6</b> | <b>8603.9</b>   | <b>0.0</b>         | <b>-4281</b> |                       |    |       |
| Social Condition + Pleasure + Gender        | 8        | 8614.9          | 11.0               | -4280        | 2.88                  | 2  | 0.237 |
| Social Condition * Pleasure                 | 8        | 8613.8          | 9.9                | -4279        | 4.04                  | 2  | 0.133 |
| Social Condition + Pleasure + BMRQ + Gender | 9        | 8618.6          | 14.7               | -4278        | 3.30                  | 1  | 0.069 |
| Social Condition * Pleasure + Gender        | 10       | 8625.1          | 21.2               | -4278        | 2.67                  | 2  | 0.264 |
| Social Condition * Pleasure + BMRQ + Gender | 11       | 8628.5          | 24.6               | -4276        | 3.54                  | 1  | 0.060 |
| Social Condition * Pleasure * BMRQ + Gender | 16       | 8656.7          | 52.8               | -4273        | 6.68                  | 5  | 0.246 |

**Table S4. Tested models for Pleasure ratings in Experiment 3.** All models included the Participant variable as random intercept. In the formulas, '\*' = interaction. 'df' = degrees of freedom. BIC = Bayesian Information Criterion.  $\Delta_i(\text{BIC})$  = difference between BIC for model i and best model's BIC. LLi = natural logarithm of the maximum likelihood for model i. Likelihood ratio tests compare the goodness of fit of that particular model to the previous nested one (i.e., the model with the same structure minus the new predictor or interaction). Gender was not tested in interaction as not hypothesized in direct relationship with main predictors. The best model is highlighted in bold.

| Fixed effects                    | df       | Measures of fit |                    |              | Likelihood Ratio Test |    |       |
|----------------------------------|----------|-----------------|--------------------|--------------|-----------------------|----|-------|
|                                  |          | BIC             | $\Delta\text{BIC}$ | LLi          | $\chi^2$              | df | p     |
| <b>Social Condition</b>          | <b>4</b> | <b>9058.0</b>   | <b>0</b>           | <b>-4515</b> |                       |    |       |
| Social Condition + Gender        | 5        | 9063.6          | 5.6                | -4514        | 1.31                  | 1  | 0.253 |
| Social Condition + BMRQ + Gender | 6        | 9070.5          | 12.5               | -4514        | 0.05                  | 1  | 0.825 |
| Social Condition * BMRQ + Gender | 7        | 9077.2          | 19.2               | -4514        | 0.24                  | 1  | 0.624 |

**Table S5. Tested models for Pleasure ratings in the IPD Meta-Analysis.** All models included the Participant variable and Experiment as random intercepts. In the formulas, “\*” = interaction. ‘df’ = degrees of freedom. BIC = Bayesian Information Criterion.  $\Delta_i(\text{BIC})$  = difference between BIC for model i and best model’s BIC.  $\text{LLi}$  = natural logarithm of the maximum likelihood for model i. Likelihood ratio tests compare the goodness of fit of that particular model to the previous nested one (i.e., the model with the same structure minus the new predictor or interaction).

Gender was not tested in interaction as not hypothesized in direct relationship with main predictors. The best model is highlighted in bold.

| Fixed effects                                    | df       | Measures of fit |                    |               | Likelihood Ratio Test |          |                   |
|--------------------------------------------------|----------|-----------------|--------------------|---------------|-----------------------|----------|-------------------|
|                                                  |          | BIC             | $\Delta\text{BIC}$ | LLi           | $\chi^2$              | df       | p                 |
| Social Condition                                 | 5        | 23939.7         | 984.4              | -11950        |                       |          |                   |
| <b>Social Condition + Song Category</b>          | <b>6</b> | <b>22955.3</b>  | <b>0.0</b>         | <b>-11454</b> | <b>992.26</b>         | <b>1</b> | <b>&lt; 0.001</b> |
| Social Condition + Gender                        | 7        | 23953.0         | 998.0              | -11949        | 2.85                  | 2        | 0.241             |
| Social Condition * Song Category                 | 7        | 22963.0         | 7.7                | -11454        | < 0.001               | 1        | 0.977             |
| Social Condition + Song Category + Gender        | 8        | 22968.8         | 13.5               | -11453        | 2.25                  | 2        | 0.324             |
| Social Condition + Song Category + BMRQ + Gender | 9        | 22972.7         | 17.4               | -11451        | 4.02                  | 1        | 0.045             |
| Social Condition * Song Category + Gender        | 9        | 22977.0         | 21.7               | -11453        | 2.25                  | 2        | 0.324             |
| Social Condition * Song Category + BMRQ + Gender | 10       | 22980.6         | 25.3               | -11451        | 4.02                  | 1        | 0.045             |
| Social Condition * Song Category * BMRQ + Gender | 13       | 23002.9         | 47.6               | -11450        | 1.34                  | 3        | 0.719             |

**Table S6. Individual differences (BMRQ for sensitivity to music reward, HEXACO and CAPRARA for prosocial traits) between the three groups in Experiment 2.** Mean = the mean value of all subjects in a group. CI = Confidence Interval.  $BF_{01}$  value reflects the probability of the data given  $H_0$  relative to  $H_1$ , that is, the strength of the evidence supporting that the tested groups are equal against the hypothesis that they are different (e.g., a  $BF_{01} = 2$  can be interpreted as the data being twice more likely under  $H_0$  than under  $H_1$ ).

|         | Group 1<br>(Non-Social) |                | Group 2<br>(Low-Social) |                | Group 3<br>(High-Social) |                | $BF_{01}$ |
|---------|-------------------------|----------------|-------------------------|----------------|--------------------------|----------------|-----------|
|         | $n = 40$                |                | $n = 34$                |                | $n = 37$                 |                |           |
|         | Mean                    | CI             | Mean                    | CI             | Mean                     | CI             |           |
| BMRQ    | 82.33                   | [80.08, 84.57] | 80.65                   | [78.62, 82.68] | 81.51                    | [78.99, 84.04] | 7.56      |
| HEXACO  | 3.71                    | [3.53, 3.89]   | 3.86                    | [3.70, 4.02]   | 3.70                     | [3.50, 3.91]   | 5.79      |
| CAPRARA | 3.95                    | [3.76, 4.14]   | 3.70                    | [3.50, 3.91]   | 3.91                     | [3.75, 4.07]   | 2.22      |

**Table S7. Experimenter-selected songs in Experiment 2.** Musical features were extracted using the Sort Your Music web app. BPM = Beats Per Minute (tempo). All ratings, except BPM, are based on a 0-100 scale and describe music in terms of Energy (arousal, relaxing vs exciting), Dance (danceability), Valence (negative/sad vs positive/happy) and Pop (popularity).

| Music Genre | Artist                                   | Title                                                   | BPM | Energy | Dance | Valence | Pop |
|-------------|------------------------------------------|---------------------------------------------------------|-----|--------|-------|---------|-----|
| Alternative | The Do                                   | On My Shoulders                                         | 116 | 70     | 72    | 52      | 41  |
|             | The Limiñanas (feat. Emmanuelle Seigner) | Shadow People                                           | 93  | 62     | 47    | 50      | 31  |
|             | Woodkid                                  | Land of All                                             | 127 | 39     | 34    | 8       | 41  |
| Blues       | Cecil Barfield                           | Georgia Blues                                           | 167 | 66     | 36    | 58      | 39  |
|             | Muddy Waters                             | Forty Days And Forty Nights                             | 89  | 41     | 60    | 81      | 28  |
|             | Brother Dege                             | Hard Row to Hoe                                         | 118 | 84     | 65    | 30      | 34  |
| Classic     | Brahms                                   | Symphony No. 3 in F Major, Op. 90 - 1. Allegro con brio | 179 | 10     | 16    | 6       | 36  |
|             | Chopin                                   | Waltz in E Minor, Op. Posth.                            | 130 | 7      | 28    | 20      | 32  |
|             | Grieg                                    | Holberg Suite, Op.40 - 1. Präludium                     | 136 | 6      | 24    | 26      | 37  |
| Country     | Nick Nolan                               | Wanted Man                                              | 100 | 86     | 56    | 63      | 30  |
|             | Jason Aldean                             | Any Ol' Barstool                                        | 144 | 72     | 54    | 50      | 39  |
|             | The Heavy Horses                         | Pale Rider                                              | 139 | 41     | 62    | 52      | 35  |
| Folk        | Anna Leone                               | Wondering                                               | 89  | 19     | 29    | 10      | 22  |
|             | Axel Flóvent                             | Sea Creatures                                           | 73  | 23     | 46    | 8       | 46  |
|             | Keilan Creech                            | Honey Waits                                             | 124 | 29     | 51    | 24      | 31  |
| Gospel      | LaShun Pace                              | There's A Leak In This Old Building                     | 172 | 40     | 59    | 62      | 36  |
|             | The Golden Gospel                        | Oh Freedom!                                             | 95  | 29     | 33    | 19      | 30  |

|                  |                             |                                       |     |    |    |    |    |
|------------------|-----------------------------|---------------------------------------|-----|----|----|----|----|
|                  | Tye Tribbett                | Anyhow                                | 152 | 43 | 42 | 39 | 34 |
| Hip-hop          | D'Angelo                    | Left and Right                        | 92  | 40 | 84 | 83 | 42 |
|                  | Terrell Morris              | Roxy                                  | 105 | 54 | 47 | 51 | 29 |
|                  | The Pharcyde                | Ya Mama                               | 90  | 79 | 83 | 74 | 43 |
| Jazz             | Anthony Lazaro              | Someone Like You                      | 80  | 22 | 64 | 38 | 20 |
|                  | Sarah Vaughan               | Tenderly                              | 66  | 12 | 20 | 7  | 26 |
|                  | Peggy Lee                   | Why Don't You Do Right                | 124 | 25 | 71 | 65 | 43 |
| Metal            | Bloodbath                   | Eaten                                 | 148 | 97 | 41 | 20 | 43 |
|                  | Mercyful Fate               | Come to the Sabbath                   | 134 | 81 | 26 | 43 | 41 |
|                  | Gorgoroth                   | Radix Malorum                         | 105 | 86 | 32 | 31 | 37 |
| Pop              | Alice on the roof           | How Long                              | 127 | 78 | 57 | 30 | 22 |
|                  | LP                          | Tightrope                             | 160 | 82 | 47 | 41 | 45 |
|                  | Jeremy Zucker               | Sinking                               | 109 | 35 | 75 | 77 | 33 |
| R&B              | Kelly Rowland               | Dirty Laundry                         | 120 | 45 | 68 | 68 | 35 |
|                  | Trey Songz (feat. Swae Lee) | Rain                                  | 138 | 42 | 62 | 40 | 27 |
|                  | Vedo                        | As Long As You Know                   | 81  | 39 | 62 | 47 | 30 |
| Rap              | Scylla                      | Et toi                                | 101 | 28 | 62 | 39 | 40 |
|                  | Lil'J Kasino                | Dirty Game Attack                     | 128 | 48 | 87 | 10 | 50 |
|                  | Suprême NTM                 | That's My People                      | 88  | 57 | 75 | 52 | 46 |
| Reggae           | Alborosie                   | Unprecedented Time                    | 132 | 61 | 79 | 86 | 31 |
|                  | Israel Vibration            | Back Stabba                           | 74  | 54 | 76 | 89 | 52 |
|                  | Naâman                      | Time Is To Rebel                      | 172 | 60 | 67 | 73 | 24 |
| Rock             | KO KO MO                    | Last Night a DJ Saved my Life         | 107 | 73 | 57 | 32 | 45 |
|                  | Lonely The Brave            | Open Door                             | 130 | 81 | 51 | 60 | 20 |
|                  | Pærish                      | Violet                                | 173 | 85 | 34 | 62 | 21 |
| Soul             | Malford Milligan            | Arms Around the World                 | 91  | 72 | 71 | 92 | 22 |
|                  | Otis Redding                | A Change Is Gonna Come                | 89  | 30 | 43 | 33 | 36 |
|                  | Cleo Sol                    | Sideways                              | 125 | 24 | 44 | 38 | 41 |
| Techno/<br>House | Âme                         | No War - Ry X Remix                   | 125 | 92 | 69 | 6  | 34 |
|                  | Ba:sen                      | In Deep We Trust (Pool Party Dub Mix) | 120 | 71 | 85 | 27 | 36 |
|                  | Vatican Shadow              | Egyptian Journalists Syndicate        | 130 | 70 | 70 | 4  | 28 |
| Variety          | Pomme                       | Adieu mon homme                       | 109 | 32 | 47 | 32 | 26 |
|                  | Alt-J (feat. Lomepal)       | 3WW                                   | 144 | 51 | 52 | 24 | 54 |
|                  | Charles Aznavour            | La Mamma                              | 104 | 44 | 46 | 36 | 39 |

**Table S8. Mean values of BPM (Beats Per Minute), Energy (arousal), Dance (danceability), and Pop (popularity) between the experimenter-selected songs listened in the 3 conditions of Experiment 2.** All ratings were extracted using the Sort Your Music web app. CI = Confidence Interval.  $BF_{01}$  = Bayes Factor.

|        | Group 1<br>(Non-Social)<br><i>n</i> = 40 |                 | Group 2<br>(Low-Social)<br><i>n</i> = 34 |                 | Group 3<br>(High-Social)<br><i>n</i> = 37 |                 | $BF_{01}$ |
|--------|------------------------------------------|-----------------|------------------------------------------|-----------------|-------------------------------------------|-----------------|-----------|
|        | Mean                                     | CI              | Mean                                     | CI              | Mean                                      | CI              |           |
| BPM    | 119.39                                   | [99.49, 138.15] | 118.87                                   | [98.99, 137.70] | 116.19                                    | [97.11, 135.81] | 6.00      |
| Energy | 52.74                                    | [27.14, 78.15]  | 51.73                                    | [26.56, 77.68]  | 51.89                                     | [26.58, 77.62]  | 6.58      |
| Dance  | 54.58                                    | [40.88, 67.71]  | 53.68                                    | [40.22, 67.00]  | 54.14                                     | [40.51, 67.30]  | 6.56      |
| Pop    | 35.77                                    | [32.73, 38.44]  | 34.15                                    | [31.48, 37.19]  | 35.33                                     | [32.31, 38.06]  | 4.84      |

**Table S9. Experiment 2. Distribution of time availability in the different Social conditions (Groups).**

| Time availability<br>(minutes) | Group 1<br>(Non-Social)<br><i>n</i> = 40 |            | Group 2<br>(Low-Social)<br><i>n</i> = 34 |            | Group 3<br>(High-Social)<br><i>n</i> = 37 |            |
|--------------------------------|------------------------------------------|------------|------------------------------------------|------------|-------------------------------------------|------------|
|                                | Frequency                                | Percentage | Frequency                                | Percentage | Frequency                                 | Percentage |
| 0                              | 1                                        | 2.5%       | 0                                        | 0.0%       | 0                                         | 0.0%       |
| 5                              | 3                                        | 7.5%       | 7                                        | 20.6%      | 2                                         | 5.4%       |
| 10                             | 4                                        | 10.0%      | 4                                        | 11.8%      | 3                                         | 8.1%       |
| 20                             | 32                                       | 80.0%      | 23                                       | 67.7%      | 32                                        | 86.5%      |



**Table S10. Experiment 2. Distribution of donation amounts in the different social conditions (groups).**

| Donation amount (€) | Group 1<br>(Non-Social)<br><i>n</i> = 40 |                   | Group 2<br>(Low-Social)<br><i>n</i> = 34 |                   | Group 3<br>(High-Social)<br><i>n</i> = 37 |                   |
|---------------------|------------------------------------------|-------------------|------------------------------------------|-------------------|-------------------------------------------|-------------------|
|                     | <i>Frequency</i>                         | <i>Percentage</i> | <i>Frequency</i>                         | <i>Percentage</i> | <i>Frequency</i>                          | <i>Percentage</i> |
| 0                   | 9                                        | 22.5%             | 7                                        | 20.6%             | 12                                        | 32.4%             |
| 10                  | 7                                        | 17.5%             | 6                                        | 17.6%             | 3                                         | 8.1%              |
| 20                  | 7                                        | 17.5%             | 5                                        | 14.7%             | 5                                         | 13.5%             |
| 30                  | 5                                        | 12.5%             | 2                                        | 5.9%              | 3                                         | 8.1%              |
| 40                  | 2                                        | 5.0%              | 0                                        | 0.0%              | 0                                         | 0.0%              |
| 50                  | 10                                       | 25.0%             | 14                                       | 41.2%             | 14                                        | 37.9%             |

**Table S11. Playlists in Experiment 3.** Music extracts were rated in terms of Pleasure (general pleasantness), Arousal, Valence, and Familiarity on a 1-5 scale by an independent sample of participants (see<sup>2</sup>).

| Playlist         | Compositor                                               | Title                                                                          | Arousal | Valence | Familiarity | Pleasure |
|------------------|----------------------------------------------------------|--------------------------------------------------------------------------------|---------|---------|-------------|----------|
| A                | Tomaso Albinoni                                          | Sonata No. 9 in G Major, Op. 6: III. Adagio                                    | 2.06    | 2.06    | 1.53        | 3.18     |
|                  | Carl Friedrich Abel                                      | Sonata for violoncello and basso continuo in G Major, WKO 147: III. Rondeau    | 3.71    | 3.41    | 1.71        | 2.82     |
|                  | Johann Sebastian Bach                                    | Viola da gamba Sonata No. 3 in G Minor, BWV 1029: II. Adagio                   | 2.35    | 2.71    | 1.71        | 2.59     |
|                  | Alban Berg                                               | Sarabande in F Major                                                           | 3.35    | 3.18    | 1.47        | 2.94     |
|                  | Tomas Breton                                             | 4 Spanish Pieces: No. 3. Bolero                                                | 2.59    | 3.12    | 1.47        | 3.12     |
|                  | Louis-Nicolas Clerambault                                | Le Triomphe d'Iris, Entree I: Overture                                         | 3.35    | 2.88    | 1.59        | 2.41     |
|                  | Leoš Janáček                                             | Nursery Rhymes, JW V/17: I. Introduction                                       | 2.88    | 3.06    | 1.53        | 2.35     |
|                  | Felix Mendelssohn                                        | Piano Concerto No. 2 in D Minor, Op. 40, MWV O 11: II. Adagio. Molto sostenuto | 1.53    | 2.12    | 1.59        | 3.29     |
|                  | Richard Strauss                                          | Stimmungsbilder, Op. 9, TrV 127: III. Intermezzo                               | 2.47    | 2.47    | 1.35        | 2.59     |
|                  | Dmitri Shostakovich                                      | The Gadfly Suite, Op. 97a: VIII. Romance                                       | 2.12    | 2.94    | 1.82        | 3.24     |
| Matthew Locke    | For Several Friends: Suite in G Major-minor: I. Fantazie | 3.18                                                                           | 3.29    | 1.47    | 2.53        |          |
| Frederick Delius | 3 Small Tone Poems: I. Summer Evening                    | 2.00                                                                           | 2.82    | 1.53    | 2.71        |          |
| B                | Arcangelo Corelli                                        | Violin Sonata in D Minor, "Follia", Op. 5 No. 12                               | 2.41    | 2.76    | 1.47        | 2.35     |
|                  | Léo Delibes                                              | Coppélia / Tableau 2 - 17. Gigue                                               | 3.47    | 3.35    | 1.71        | 3.29     |
|                  | Dvořák                                                   | Serenade for Strings in E Major, Op. 22, B. 52: II. Tempo di valse             | 3.18    | 3.18    | 1.82        | 3.76     |
|                  | Enrique Granados                                         | Valses Poeticos - 5 Allegretto                                                 | 3.12    | 3.47    | 1.59        | 3.18     |
|                  | Leoš Janáček                                             | Lachian Dances, JW VI/17: No. 6, Saw Dance                                     | 3.12    | 3.59    | 1.71        | 3.24     |
|                  | Tchaikovsky                                              | Souvenir de Florence, Op. 70, TH 118 - IV. Allegro vivace                      | 3.24    | 2.82    | 1.65        | 3.35     |
|                  | Franz Joseph Haydn                                       | Symphony No. 78 in C minor                                                     | 3.29    | 3.06    | 1.59        | 3.24     |
|                  | Charles Ives                                             | Symphony No. 4: III. Fugue: Andante moderato con moto                          | 2.47    | 2.65    | 1.65        | 2.59     |
|                  | Johann Strauss II                                        | Un ballo in maschera, Quadrille, Op. 272                                       | 4.47    | 3.82    | 1.76        | 2.94     |
|                  | Johann Strauss II & Josef Strauss                        | Pizzicato Polka                                                                | 2.53    | 3.18    | 1.41        | 2.31     |
| Gustav Mahler    | Symphony No. 4 - III. Ruhevoll, poco adagio              | 1.82                                                                           | 1.94    | 1.47    | 3.00        |          |

|   |                               |                                                                                                     |      |      |      |      |
|---|-------------------------------|-----------------------------------------------------------------------------------------------------|------|------|------|------|
|   | Carl Nielsen                  | Symphony No. 1 in G minor, Op. 7, III.<br>Allegro comodo - Andante sostenuto -<br>Tempo 1           | 2.12 | 3.12 | 1.47 | 2.35 |
|   | Tomaso Giovanni Albinoni      | Concerto for two oboes, strings & b.c. in C major (Op. 7 n. 2)                                      | 3.00 | 3.24 | 1.65 | 2.53 |
|   | Tomás Bretón                  | Symphony No.1 in F-major-II-Andante                                                                 | 2.71 | 3.24 | 1.47 | 3.12 |
|   | Arcangelo Corelli             | Violin Sonata in D minor, Op.5 No.7                                                                 | 3.41 | 3.71 | 1.65 | 2.82 |
|   | Joseph Nicolas Pancrace Royer | Pièces de clavecin, Book 1: VI. L'aimable: Gracieux                                                 | 2.35 | 2.65 | 1.29 | 2.65 |
|   | Frederick Delius              | Two Aquarelles - Gaily, But Not Too Quick                                                           | 2.59 | 2.82 | 1.47 | 2.59 |
| C | Marin Marais                  | Suite in E minor - VII - Gigue La Resolue                                                           | 3.24 | 3.41 | 1.47 | 2.41 |
|   | Alessandro Marcello           | Trumpet Concerto in C Minor: I. Allegro moderato                                                    | 2.88 | 3.18 | 1.59 | 2.82 |
|   | Felix Mendelssohn             | Clarinet Sonata in E-flat major, BWV Q15, II. Andante                                               | 2.71 | 3.00 | 1.41 | 2.88 |
|   | W. A. Mozart                  | Rondo in D Major K. Anh. 184                                                                        | 2.65 | 3.06 | 1.71 | 2.76 |
|   | Francis Poulenc               | Elégie (en accords alternés)                                                                        | 2.00 | 2.59 | 1.53 | 2.47 |
|   | Richard Strauss               | Sonata for Piano in B Minor, Op. 5: II. Adagio cantabile                                            | 2.47 | 2.88 | 1.53 | 3.00 |
|   | Domenico Scarlatti            | Sonata in D Major, K 491                                                                            | 2.82 | 3.18 | 1.65 | 3.18 |
|   | Léo Delibes                   | Coppélia, Act II: Scène et danse de la Poupée                                                       | 3.18 | 3.06 | 1.65 | 2.88 |
|   | Enrique Granados              | Goyescas - Suite - 3. El Fandango del Candil                                                        | 2.41 | 2.88 | 1.35 | 2.53 |
|   | Domenico Scarlatti            | Sonata in F minor, K.466                                                                            | 1.65 | 2.06 | 1.71 | 2.65 |
|   | Franz Schubert                | Symphony No.10 in D (D. 936A) II. Andante                                                           | 2.24 | 2.94 | 1.59 | 2.47 |
|   | Dmitri Shostakovich           | Piano Concerto No. 2 in F Major, Op. 102: I. Allegro                                                | 3.53 | 3.71 | 1.41 | 2.53 |
|   | Alexander Scriabin            | Deux Poèmes Op. 32 (n. 1 in F Major)                                                                | 2.65 | 3.00 | 1.53 | 2.47 |
| D | Tchaikovsky                   | Piano Trio in A Minor, Op. 50: II. Variazione VI (Tempo di valse)                                   | 3.41 | 2.76 | 1.47 | 2.59 |
|   | Richard Wagner                | Parsifal-Paraphrase                                                                                 | 2.12 | 2.18 | 1.71 | 2.88 |
|   | Friedrich Fasch               | Overture (Suite) in D minor: V. Jardiniers                                                          | 3.41 | 3.53 | 1.65 | 2.82 |
|   | Gabriel Faure                 | Masques et Bergamasques, Suite, Op.112 - IV. Pastorale                                              | 2.59 | 2.71 | 1.82 | 3.29 |
|   | Franz Joseph Haydn            | String Quartet No. 63 in B-Flat Major, Op. 76, No. 4, Hob.III:78, "Sunrise": III. Menuetto: Allegro | 3.18 | 3.41 | 1.59 | 2.82 |
|   | Johann Joachim Quantz         | Flute Concerto in A Minor, QV 5:238: I. Allegretto                                                  | 3.41 | 3.59 | 1.59 | 3.29 |

**Table S12. Mean values of Arousal, Valence, Familiarity and Pleasure between the four Playlists presented in Experiment 3.** CI = Confidence Interval.  $BF_{01}$  = Bayes Factor.

|             | Playlists  |              |            |              |            |              |            |              | $BF_{01}$ |
|-------------|------------|--------------|------------|--------------|------------|--------------|------------|--------------|-----------|
|             | Playlist A |              | Playlist B |              | Playlist C |              | Playlist D |              |           |
|             | $n = 12$   |              | $n = 12$   |              | $n = 12$   |              | $n = 12$   |              |           |
|             | Mean       | CI           | Mean       | CI           | Mean       | CI           | Mean       | CI           |           |
| Arousal     | 2.63       | [2.21, 3.06] | 2.94       | [2.49, 3.39] | 2.73       | [2.49, 2.98] | 2.82       | [2.42, 3.21] | 5.50      |
| Valence     | 2.38       | [2.56, 3.11] | 3.08       | [2.76, 3.39] | 3.08       | [2.88, 3.28] | 2.97       | [2.65, 3.32] | 4.44      |
| Familiarity | 1.56       | [1.48, 1.64] | 1.60       | [1.53, 1.69] | 1.54       | [1.46, 1.61] | 1.59       | [1.50, 1.67] | 4.61      |
| Pleasure    | 2.81       | [2.60, 3.03] | 2.97       | [2.67, 3.26] | 2.77       | [2.61, 2.93] | 2.77       | [2.59, 2.95] | 2.22      |

### SI References

1. Lee, M.D., and Wagenmakers, E.-J. (2014). *Bayesian Cognitive Modeling: A Practical Course* (Cambridge University Press).
2. Ferreri, L., and Rodriguez-Fornells, A. (2017). Music-related reward responses predict episodic memory performance. *Exp. Brain Res.* 235, 3721–3731. [10.1007/s00221-017-5095-0](https://doi.org/10.1007/s00221-017-5095-0).
